# Supplementary material for: Metabolites Potentially Derived from Gut Microbiota Associated with Podocyte, Proximal Tubule, and Renal and Cerebrovascular Endothelial Damage in Early Diabetic Kidney Disease in T2DM Patients
Source: MDPI journal article supplement (doi:10.3390/metabo13080893), 2023-07-28
Supplement: s1 [file s1]

**Table S1 Serum univariable analysis**

| <b>Dependent variable</b>        | <b>Independent variable</b> | <b>R<sup>2</sup></b> | <b>Coef <math>\beta</math></b> | <b>P value (prob &gt; F)</b> |
|----------------------------------|-----------------------------|----------------------|--------------------------------|------------------------------|
| <b>sArg</b>                      | IMT                         | 0.0594               | -10.49                         | 0.0061                       |
|                                  | PI R-ACI                    | 0.0594               | -11.15                         | 0.0061                       |
|                                  | PI R-ACM                    | 0.0743               | -12.09                         | 0.0024                       |
|                                  | RI R-ACI                    | 0.1526               | -14.06                         | <0.0001                      |
|                                  | RI R-ACM                    | 0.1216               | -12.51                         | 0.0001                       |
|                                  | BHI                         | 0.163                | 14.46                          | <0.0001                      |
|                                  | MCP-1                       | 0.1945               | -0.05                          | <0.0001                      |
|                                  | ICAM-1                      | 0.1986               | -0.05                          | <0.0001                      |
| <b>sHA</b>                       | IMT                         | 0.101                | -4.54                          | 0.0004                       |
|                                  | PI R-ACI                    | 0.0479               | -3.47                          | 0.0127                       |
|                                  | PI R-ACM                    | 0.047                | -3.401                         | 0.0130                       |
|                                  | RI R-ACI                    | 0.0126               | -1.837                         | 0.1257                       |
|                                  | RI R-ACM                    | 0.0931               | -3.61                          | 0.0013                       |
|                                  | BHI                         | 0.0918               | 3.7                            | 0.0008                       |
|                                  | MCP-1                       | -0.0089              | -0.0008                        | 0.8208                       |
|                                  | ICAM-1                      | 0.0059               | -0.004                         | 0.2031                       |
| <b>sIS (<math>\mu</math>M)</b>   | IMT                         | 0.0555               | 2.947497                       | 0.0078                       |
|                                  | PI R-ACI                    | 0.0316               | 2.490465                       | 0.0358                       |
|                                  | PI R-ACM                    | 0.0442               | 2.556245                       | 0.0282                       |
|                                  | RI R-ACI                    | 0.0331               | 2.164511                       | 0.0324                       |
|                                  | RI R-ACM                    | 0.0431               | 2.291736                       | 0.0172                       |
|                                  | BHI                         | 0.0572               | -2.60003                       | 0.0007                       |
|                                  | MCP-1                       | 0.0949               | .0104853                       | 0.0007                       |
|                                  | ICAM-1                      | 0.1309               | .0128135                       | 0.0001                       |
| <b>sLAC (<math>\mu</math>M)</b>  | IMT                         | -0.0071              | 0.37                           | 0.6234                       |
|                                  | PI R-ACI                    | -0.004               | 0.603                          | 0.452                        |
|                                  | PI R-ACM                    | -0.0062              | 0.45                           | 0.5628                       |
|                                  | RI R-ACI                    | 0.0156               | 1.112051                       | 0.1029                       |
|                                  | RI R-ACM                    | -0.0086              | 0.1820748                      | 0.7806                       |
|                                  | BHI                         | -0.0078              | -0.2652648                     | 0.6868                       |
|                                  | MCP-1                       | 0.0964               | 0.007086                       | 0.0006                       |
|                                  | ICAM-1                      | 0.0952               | 0.0074211                      | 0.0006                       |
| <b>sBCA (<math>\mu</math>M)</b>  | IMT                         | 0.0608               | 0.4235481                      | 0.0056                       |
|                                  | PI R-ACI                    | 0.0798               | 0.5077507                      | 0.0017                       |
|                                  | PI R-ACM                    | 0.0845               | 0.5119193                      | 0.0013                       |
|                                  | RI R-ACI                    | 0.1560               | 0.5756828                      | <0.0001                      |
|                                  | RI R-ACM                    | 0.0875               | 0.4301584                      | 0.0010                       |
|                                  | BHI                         | 0.0874               | -0.4329471                     | 0.0011                       |
|                                  | MCP-1                       | 0.2855               | 0.0024359                      | <0.0001                      |
|                                  | ICAM-1                      | 0.2331               | 0.0023264                      | <0.0001                      |
| <b>sSorb (<math>\mu</math>M)</b> | IMT                         | 0.0560               | 0.35                           | 0.0132                       |
|                                  | PI R-ACI                    | 0.0710               | 0.44                           | 0.0029                       |

|  |          |        |       |         |
|--|----------|--------|-------|---------|
|  | PI R-ACM | 0.0593 | 0.403 | 0.0061  |
|  | RI R-ACI | 0.1213 | 0.47  | 0.0002  |
|  | RI R-ACM | 0.0875 | 0.37  | 0.0018  |
|  | BHI      | 0.0357 | -0.27 | 0.0275  |
|  | MCP-1    | 0.179  | 0.001 | <0.0001 |
|  | ICAM-1   | 0.187  | 0.002 | <0.0001 |

**Table S2 Univariable urine analysis**

| Dependent variable | Independent variable | R <sup>2</sup> | Coef $\beta$ | P value |
|--------------------|----------------------|----------------|--------------|---------|
| <b>uArg</b>        | Synaptopodin         | 0.0418         | 0.0242024    | 0.0186  |
|                    | Podocalyxin          | -0.0082        | 0.0004799    | 0.7258  |
|                    | KIM-1                | -0.0070        | 0.0004832    | 0.6159  |
|                    | NAG                  | -0.0076        | -0.0160105   | 0.6697  |
|                    | RAC                  | 0.1212         | 0.0017062    | 0.0001  |
|                    |                      |                |              |         |
| <b>uLAC</b>        | Synaptopodin         | 0.2446         | 0.0071333    | <0.0001 |
|                    | Podocalyxin          | 0.0492         | 0.0004501    | 0.0116  |
|                    | KIM-1                | 0.0306         | 0.0002619    | 0.0380  |
|                    | NAG                  | 0.0231         | 0.00919      | 0.0622  |
|                    | RAC                  | 0.4088         | 0.000404     | <0.0001 |
|                    |                      |                |              |         |
| <b>uBCA</b>        | Synaptopodin         | 0.1778         | 0.0216489    | <0.0001 |
|                    | Podocalyxin          | 0.0737         | 0.0018953    | 0.0025  |
|                    | KIM-1                | 0.0742         | 0.0013386    | 0.0024  |
|                    | NAG                  | 0.0630         | 0.0485265    | 0.0049  |
|                    | RAC                  | 0.2874         | 0.0012031    | <0.0001 |
|                    |                      |                |              |         |
| <b>uHA</b>         | Synaptopodin         | 0.0247         | 0.3203106    | 0.0559  |
|                    | Podocalyxin          | -0.0093        | 0.002758385  | 0.9991  |
|                    | KIM-1                | -0.0090        | 0.0031451    | 0.8406  |
|                    | NAG                  | 0.2038916      | 0.2038916    | 0.7378  |
|                    | RAC                  | 0.0626         | 0.0205445    | 0.0050  |
|                    |                      |                |              |         |
| <b>uIS</b>         | Synaptopodin         | 0.1778         | 0.0216489    | <0.0001 |
|                    | Podocalyxin          | 0.0737         | 0.0018953    | 0.0025  |
|                    | KIM-1                | 0.0742         | 0.0013386    | 0.0024  |
|                    | NAG                  | 0.0630         | 0.0485265    | 0.0049  |
|                    | RAC                  | 0.2874         | 0.0012031    | <0.0001 |
|                    |                      |                |              |         |
| <b>uPCS</b>        | Synaptopodin         | 0.2352         | 0.0948555    | <0.0001 |
|                    | Podocalyxin          | 0.0713         | 0.0071605    | 0.0029  |
|                    |                      |                |              |         |
|                    | KIM-1                | 0.0496         | 0.0043104    | 0.0113  |
|                    | NAG                  | 0.0451         | 0.1614279    | 0.0150  |
|                    | RAC                  | 0.3808         | 0.0052878    | <0.0001 |
